# Supplementary material for: A hackable, multi-functional, and modular extrusion 3D printer for soft materials
Source: PubMed Central journal article supplement (PMC9296631; doi:10.1038/s41598-022-16008-6), 2022-07-19
Supplement: 41598_2022_16008_MOESM3_ESM.pdf [file 41598_2022_16008_MOESM3_ESM.pdf]

1 **A hackable, multi-functional, and modular extrusion 3D printer**  
2 **for soft materials**

3

4 **Supplementary information**

5

6 Iek Man Lei<sup>1,2</sup>, Yaqi Sheng<sup>1,2</sup>, Chon Lok Lei<sup>3,4</sup>, Cillian Leow<sup>1</sup> and Yan Yan Shery Huang<sup>1,2\*</sup>

7

8 *1 Department of Engineering, University of Cambridge, Cambridge, United Kingdom*

9 *2 The Nanoscience Centre, University of Cambridge, Cambridge, United Kingdom*

10 *3 Institute of Translational Medicine, Faculty of Health Sciences, University of Macau, Macau*

11 *4 Department of Computer Science, University of Oxford, Oxford, United Kingdom*

12

13 *\* Corresponding: [yysh2@cam.ac.uk](mailto:yysh2@cam.ac.uk)*

14

## 15 I. Printer specification

16 **Supplementary Table 1| Table comparing the system developed in this work with the**  
 17 **reported open-source extrusion bioprinters.** PF127 = Pluronic F127, PAA = polyacrylic  
 18 acid, CMC = sodium carboxymethyl cellulose, NaAlg = sodium alginate, PCL =  
 19 Polycaprolactone, hiPSCs = Human induced pluripotent stem cells, and ECM = extracellular  
 20 matrix.

| Ref                                      | Hardware                                           | Geometry inputs | Auxiliary tools           | No. of inks tested                                                              | Geometry                                          | Applications demonstrated                                |
|------------------------------------------|----------------------------------------------------|-----------------|---------------------------|---------------------------------------------------------------------------------|---------------------------------------------------|----------------------------------------------------------|
| Hinton et al (2015) <sup>1</sup>         | Piston-based extruder with a commercial 3D printer | CAD             | Stage heater              | 4<br>• <i>NaAlg</i><br>• <i>Fibrinogen</i><br>• <i>Collagen</i><br>• <i>ECM</i> | bone, heart, vascular-like structures             | Freeform structure                                       |
| Reid et al (2016) <sup>2</sup>           |                                                    | (bioplotter)    | -                         | <i>hiPSCs, MCF-12a</i>                                                          | (dispenser)                                       | Cell aggregates                                          |
| Nava et al (2017) <sup>3</sup>           |                                                    | n/a             | -                         | 1<br>• <i>NaAlg</i>                                                             | Line                                              | Cell-laden line                                          |
| Polley et al (2017) <sup>4</sup>         |                                                    | -               | -                         | 1<br>• <i>NaAlg</i>                                                             | Gridline                                          | Cell-laden construct                                     |
| Bessler, et al. (2019) <sup>5</sup>      |                                                    | CAD             | -                         | 1<br>• <i>NaAlg</i>                                                             | Cylinder and rectangle scaffolds                  | Cell-laden structure                                     |
| Kahl, et al. (2019) <sup>6</sup>         |                                                    | CAD             | -                         | 2<br>• <i>NaAlg</i><br>• <i>NaAlg-gelatin</i>                                   | Lattice, cylinder and pyramid scaffolds           | Cell proliferation                                       |
| Ioannidis, et al. (2020) <sup>7</sup>    |                                                    | CAD             | -                         | 1<br>• <i>NaAlg-gelatin</i>                                                     | Line patterns                                     | Cell proliferation and differentiation                   |
| Krige et al (2020) <sup>8</sup>          |                                                    | n/a             | UV                        | 2<br>• <i>Gelma</i><br>• <i>sodium hyaluronate</i>                              | Line patterns, rocket-shaped construct            | Biofilm electrode                                        |
| Tashman et al. (2021) <sup>9</sup>       |                                                    | n/a             | -                         | 1<br>• <i>Collagen</i>                                                          | Microfluidic network                              | Perfusable microfluidic network                          |
| Engberg et al. (2021) <sup>10</sup>      |                                                    | CAD             | Camera, HEPA filter       | 2<br>• <i>collagen</i><br>• <i>lamina</i>                                       | Rectangular                                       | Cell-laden multimaterial structure                       |
| Koch et al (2021) <sup>11</sup>          |                                                    | CAD             | Syringe heater            | 3<br>• <i>NaAlg-gelatin</i><br>• <i>silicone</i><br>• <i>PCL</i>                | Line, lattices                                    | Hybrid material lattice for osteochondral applications   |
| Cadiou et al (2021) <sup>12</sup>        |                                                    | CAD             | -                         | 1<br>• <i>Epoxy</i>                                                             | Dog bone                                          | Composite structure with improved mechanical performance |
| Leech et al (2021) <sup>13</sup>         |                                                    | CAD             | -                         | 3<br>• <i>Gelatin</i><br>• <i>Chitosan</i><br>• <i>Marmite</i>                  | Line grids                                        | n/a                                                      |
| Sanz-Garcia et al (2020) <sup>14</sup>   | Pneumatic extruder with a commercial 3D printer    | CAD             | Syringe heater and cooler | 2<br>• PF127<br>• <i>Gelatin- NaAlg</i>                                         | Concentric square, circle, pillars, log-pipe      | Cell-laden lattices                                      |
| Feinberg, et al. (2018) <sup>15-17</sup> | Piston-based extruder with existing build plate    | CAD             | -                         | 1<br>• <i>NaAlg</i>                                                             | 3D constructs, full size model of the human heart | Patient-specific anatomical models                       |

|                                        |                                                                                 |              |                                          |                                                                                 |                                                                                            |                                                                        |
|----------------------------------------|---------------------------------------------------------------------------------|--------------|------------------------------------------|---------------------------------------------------------------------------------|--------------------------------------------------------------------------------------------|------------------------------------------------------------------------|
| Ravi et al. (2015) <sup>18</sup>       |                                                                                 | CAD          | UV,                                      | 2<br>• Toothpaste<br>• Black ink                                                | Rectangular, grid                                                                          | n/a                                                                    |
| Xing et al. (2017) <sup>19</sup>       |                                                                                 | G-code (CAD) | -                                        | 1<br>• PF127-glycerol                                                           | Log-pipe, ring scaffold                                                                    | n/a                                                                    |
| Fitzsimmon, et al.(2018) <sup>20</sup> | Piston-based extruders with linear stages                                       | CAD          | Syringe heater                           | 5<br>• Gelatin<br>• GelMA<br>• Gelatin-hyaluronan<br>• Gelatin-NaAlg<br>• PF127 | Cell-laden line pattern, 3D constructs (cube, cylinder and star), Constructs with channels | HUVEC culture in channels                                              |
| Yenilmez, et al. (2019) <sup>21</sup>  |                                                                                 | Picture, CAD | UV module, coaxial printhead             | 1<br>• NaAlg                                                                    | Cell-laden grid scaffold                                                                   | Cell-laden construct                                                   |
| Zhang et al. (2019)                    |                                                                                 | n/a          | Heating                                  | 1<br>• Silver                                                                   | Line pattern                                                                               | Soft actuation                                                         |
| Lanaro et al (2021) <sup>22</sup>      |                                                                                 | n/a          | Heating                                  | 2<br>• PCL<br>• PF127                                                           | Lattice                                                                                    | n/a                                                                    |
| Shen, et al. (2021) <sup>23</sup>      | Pneumatic extruder with linear stages                                           | CAD          | -                                        | 1<br>• NaAlg                                                                    | Alginate hydrogel with concentration gradient, a femur model                               | Cell-laden structures, structure with embedded concentration gradients |
| Peng, et al. (2021) <sup>24</sup>      |                                                                                 | CAD          | Digital light processing (DLP) projector | • Liquid crystal elastomer<br>• Photocurable urethane<br>• Silver               | Line, spiral, ring, buzz patterns, rings                                                   | Soft actuation, circuit-embedding architectures, strain sensors        |
| Uzel, et al. (2022) <sup>25</sup>      |                                                                                 | n/a          | Line profilometer                        | 3<br>• PF127<br>• Gelatin<br>• Photo-polymerisable urethane-based materials     | Line patterns, crest motif                                                                 | Adaptive conformal patterning                                          |
| Shim et al. (2012) <sup>26</sup>       | Pneumatic and piston-based extruders with linear stages                         | CAD          | Syringe heater                           | 2<br>• PCL<br>• NaAlg                                                           | Letters, 2D bone-shaped structure                                                          | Porous osteochondral structure                                         |
| Lee et al. (2017) <sup>27</sup>        |                                                                                 | CAD          | Syringe heater                           | 3<br>• PLGA<br>• Hyaluronic acid<br>• HA-alpha-TCP                              | Lattice, cylinder scaffold                                                                 | Cell-laden hybrid lattice                                              |
| Byrne et al. (2018) <sup>28</sup>      | Pneumatic and FDM extruders with a rotational mandrel and commercial 3D printer | CAD          | FDM extruder heater                      | 2<br>• Silicone<br>• Thermoplastic elastomer                                    | Line grids                                                                                 | Soft actuation                                                         |
| Ozbolat, et al. (2014) <sup>29</sup>   | Pneumatic extruders and commercial syringe pump with linear stages              | CAD          | Coaxial printhead                        | 2<br>• NaAlg<br>• Cell spheroid                                                 | Lattice                                                                                    | Cell proliferation                                                     |
| Spiesz, et al. (2019) <sup>30</sup>    | Commercial syringe pump with commercial 3d printer                              | Coordinates  | -                                        | 1<br>• NaAlg                                                                    | 2D patterns                                                                                | Spatially-controlled model for E.coli bacteria culture                 |
| Ghosheh et al (2016) <sup>31</sup>     | Commercial syringe pump with linear stages                                      | CAD          | UV, camera                               | 1<br>• PEGDA                                                                    | Line patterns                                                                              | n/a                                                                    |

|                                       |                                           |                                                                                       |                                                        |                                                                                                                                                                                                                                                                        |                                                                                                                                                |                                                                                                                                                                                                                |
|---------------------------------------|-------------------------------------------|---------------------------------------------------------------------------------------|--------------------------------------------------------|------------------------------------------------------------------------------------------------------------------------------------------------------------------------------------------------------------------------------------------------------------------------|------------------------------------------------------------------------------------------------------------------------------------------------|----------------------------------------------------------------------------------------------------------------------------------------------------------------------------------------------------------------|
| Fortunato et al. (2021) <sup>32</sup> | Pneumatic extruder with a robotic arm     | CAD                                                                                   | -                                                      | 1<br>• Pluronic acid                                                                                                                                                                                                                                                   | Line pattern                                                                                                                                   | Non-planar printing                                                                                                                                                                                            |
| <b>This work</b>                      | Piston-based extruders with a robotic arm | <b>*4 geometry input options</b><br>• Coordinates<br>• Equation<br>• CAD<br>• Picture | • Stage heater<br>• Syringe heater<br>• UV<br>• Camera | <b>*11</b><br>• <i>Hydrogels (PF127, CMC, NaAlg, gelatin, PAA, PEGDA, methacrylate hydroxylpropyl cellulose, sodium hyaluronate)</i><br>• <i>Silicone elastomer (SE1700)</i><br>• <i>Bioceramic hydrogels (i.e. NaAlg – hydroxyapatite)</i><br>• <i>3T3 suspension</i> | <b>*Able to construct complex objects</b><br>• Multi-material 3D constructs,<br>• 2D embedded vascular-like channels<br>• 3D intricate objects | <b>*Multiple functions apart from in-air printing</b><br>• Multimaterial printing<br>• Embedded printing<br>• Liquid dispensing<br>• Printing with variable speed<br>• Non-planar printing<br>• Pick-and-place |

21  
22  
23  
24  
25  
26  
27

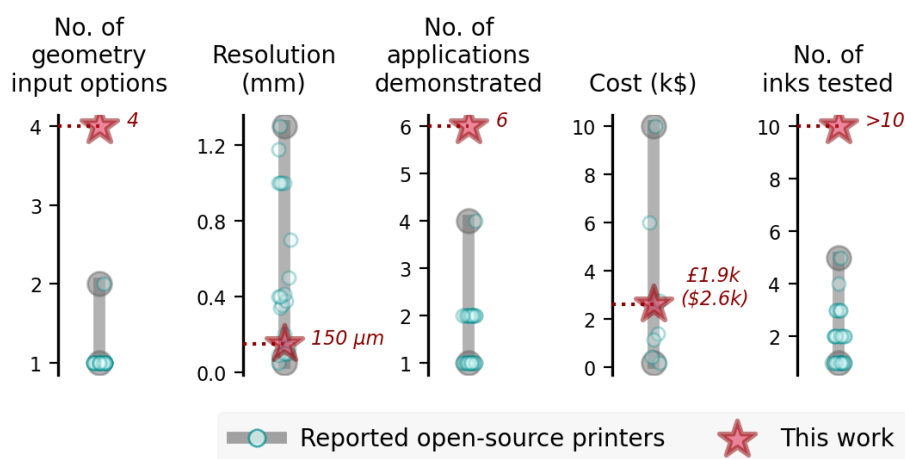

28  
29  
30  
31  
32  
33

**Supplementary Figure 1** | A summary comparing work reported in this study, and those reported by existing open-source printer platforms (see above Printer specification for literature source).

34 **Supplementary Table 2| Specifications of the system developed in this study and the**  
 35 **four commercial 3D extrusion-based bioprinters commonly used in the bioprinting**  
 36 **community.** The commercial systems are Allevi 3<sup>33</sup> (denoted as ‡ below), Cellink  
 37 BioX<sup>34,35</sup> (†) and Envision TEC 3D Bioplotter Starter Series<sup>36</sup> (\*) and GeSim  
 38 BioScaffolder BS3.3<sup>37</sup> (§). It should be noted that, though Printer.HM has a lower  
 39 mechanical resolution and a narrower heating range than commercial systems, soft  
 40 material printing typically does not require a high temperature (*i.e.* > 60 °C), and the  
 41 print resolution of extrusion soft material printing is in general > 100 µm. As Printer.HM  
 42 is designed for soft material fabrication purpose, the heating range and the mechanical  
 43 resolution adopted in Printer.HM are considerably adequate.

|                                            | <b>This setup</b>                                                                                             | <b>Commercial systems</b>                                                                                                |
|--------------------------------------------|---------------------------------------------------------------------------------------------------------------|--------------------------------------------------------------------------------------------------------------------------|
| Cost                                       | £0.9k (single printhead system) - £1.9k (systems with 4 printheads, syringe and stage heaters, UV and camera) | \$10k – 100k <sup>38</sup>                                                                                               |
| Maximum no. of printhead slots             | 6 printheads for one Arduino board                                                                            | • 3 (‡, †)<br>• 2 (*)<br>• 4 (§)                                                                                         |
| Geometry input                             | • Coordinates<br>• CAD<br>• Equations<br>• Picture                                                            | • CAD (‡, †, *, §)                                                                                                       |
| Mechanical resolution of the motion system | • 200 µm                                                                                                      | • 1 µm (‡, †, *)<br>• Information not available (§)                                                                      |
| Extruder temperature control               | • RT – 60 °C                                                                                                  | • 4 °C – 160 °C (‡)<br>• 4 °C – 65 °C / 250 °C (†)<br>• 30 °C – 250 °C (*)<br>• 4 °C – 80 °C / RT – 190 °C or 250 °C (§) |
| Printbed temperature control               | • RT – 60 °C (tested range)                                                                                   | • RT – 60 °C (‡)<br>• 4 – 65 °C (†)<br>• Not available (*, §)                                                            |
| UV power                                   | • 365/405 nm                                                                                                  | • Yes (365/405 nm) (‡)<br>• Yes (365/405/450/485/520nm) (†)<br>• No (*)<br>• UV LED (§)                                  |
| Extrusion method                           | • Mechanical                                                                                                  | • Pneumatic or mechanical (†, §)<br>• Pneumatic (‡, *)                                                                   |
| Compatible cartridge size                  | • 1 ml – 3 ml                                                                                                 | • 5 ml (‡)<br>• 3 ml – 10 ml (†)<br>• 3 ml – 30 ml (*)<br>• 10 ml – 30 ml (§)                                            |
| Weight                                     | • ~11 kg, 45x45x35 cm (excl. enclosure)                                                                       | • 21.8 kg, 47x40x36 cm (‡)<br>• 18 kg, 48x44x37 cm (†)<br>• 90 kg, 84x62x77 cm (*)<br>• Information not available (§)    |

44

45

## 46 II. Bills of materials

### 47 Supplementary Table 3| Part list and the breakdown costs of the printing platform.

48 The total cost refers to the associated cost of a platform equipped with 4 printheads,  
 49 stage and syringe heating systems, a UV module and a camera. \* denotes the components  
 50 used in the electrical circuit.

|            | Components                                                                         | Part number                  | Manufacturer               | Cost (£)       |
|------------|------------------------------------------------------------------------------------|------------------------------|----------------------------|----------------|
| <b>C1</b>  | <b>uArm Swift Pro Desktop Robotic Arm - Professional Kit</b>                       | -                            | ufactory                   | <b>749.98</b>  |
|            | <b>Frame</b>                                                                       |                              |                            |                |
| <b>C2</b>  | Aluminium rail (20 x 20 x 350 mm) x 4 units                                        | V SLOT2020                   | Ooznest                    | 10.08          |
| <b>C3</b>  | Aluminium rail (20 x 40 x 350 mm) x 2 units                                        | V SLOT2040                   | Ooznest                    | 8.82           |
| <b>C4</b>  | Breadboard                                                                         | MB4545/M                     | Thorlabs                   | 184.52         |
| <b>C5</b>  | Clamp x 4 units                                                                    | CL3/M                        | Thorlabs                   | 14.76          |
|            |                                                                                    |                              | <b>Subtotal</b>            | <b>203.42</b>  |
|            | <b>Printhead (Components per printhead)</b>                                        |                              |                            |                |
| <b>C6</b>  | Stepper motor, 3.8 V                                                               | 5350344                      | RS                         | 31             |
| <b>C7</b>  | Shaft coupling                                                                     | PSMR19-5-5-A                 | Ruland                     | 18             |
| <b>C8</b>  | Lead screw (107 mm)                                                                | DST-LS-6.35x2.54-R-500-ES    | Igus                       | 5.15           |
| <b>C9</b>  | Lead screw nut                                                                     | DST-JFRM-131315DS6.35X2.54   | Igus                       | 17.25          |
| <b>C10</b> | Linear rail (100 mm) x 2 units                                                     | WSQ-06                       | Igus                       | 8.62           |
| <b>C11</b> | Linear guide pillow block x 2 units                                                | WJ200QM-01-06                | Igus                       | 15.74          |
| <b>C12</b> | Ball bearing                                                                       | 624ZZ                        | NSK                        | 3.65           |
| <b>C13</b> | Aluminium rail (20 x 40 x 150 mm)                                                  | V SLOT2040                   | Ooznest                    | 1.89           |
| <b>C14</b> | Magnet (Height 3 mm diameter 4 mm) x 6 units                                       | M1219-3                      | Comus                      | 6.12           |
| <b>C15</b> | Magnet (Height 2 mm diameter 3 mm) x 6 units                                       | M1219-2                      | Comus                      | 2.7            |
| <b>C16</b> | Stepper motor drive*                                                               | A4988                        | Polulu                     | 7.18           |
| <b>C17</b> | Resistors (10 kΩ 0.6 W)*                                                           | MF006FF1002KIT               | Royal Ohm                  | 1.36           |
| <b>C18</b> | Capacitor 100 μF*                                                                  | EEAGA1A101                   | Panasonic                  | 0.06           |
|            |                                                                                    |                              | <b>Subtotal</b>            | <b>118.72</b>  |
|            | <b>Printhead (Components for whole system)</b>                                     |                              |                            |                |
| <b>C19</b> | Power adapter, 9V, 2A                                                              | VEL18US090-UK-JA             | XP Power                   | 10.24          |
| <b>C20</b> | Arduino mega*                                                                      | A000067                      | Arduino                    | 25             |
| <b>C21</b> | Breadboard*                                                                        | TW-E40-1020                  | Twin Industries            | 4.13           |
| <b>C22</b> | USB A-male to USB B-male cable*                                                    | AK-300102-010-S              | Digitus                    | 0.42           |
|            |                                                                                    |                              | <b>Subtotal</b>            | <b>39.79</b>   |
|            | <b>Heating (Components per module)</b>                                             |                              |                            |                |
| <b>C23</b> | Power adapter, 9V, 2A (syringe heater)<br>Power adapter, 12V, 500mA (stage heater) | VEL18US090-UK-JA/<br>T6116ST | XP Power or<br>Stontronics | 10.24/<br>4.02 |
| <b>C24</b> | Type K thermocouple                                                                | Z2-K-1M                      | Labfacility                | 4.64           |
| <b>C25</b> | Thermocouple Amplifier (MAX31855K)*                                                | 269                          | Adafruit                   | 12.76          |
| <b>C26</b> | MOSFET*                                                                            | IRLR/U8743PBF                | Infineon                   | 1.04           |
| <b>C27</b> | Arduino Nano*                                                                      | A000005                      | Arduino                    | 14.23          |
| <b>C28</b> | Breadboard*                                                                        | MCO1003                      | Multicomp                  | 1.10           |
| <b>C29</b> | USB A-male to USB mini B-male cable*                                               | ZUV0E3058769                 | StarTech                   | 1.4            |
|            |                                                                                    |                              | <b>Subtotal</b>            | <b>~37</b>     |
|            | <b>Heating (Components for whole system)</b>                                       |                              |                            |                |
| <b>C30</b> | 31 AWG Nichrome wire                                                               | UMNICWIRE2                   | Ultimachine                | 5              |
| <b>C31</b> | High temperature tape                                                              | 051-0002                     | Antistat                   | 4.27           |
|            |                                                                                    |                              | <b>Subtotal</b>            | <b>~50</b>     |
|            | <b>Others</b>                                                                      |                              |                            |                |
| <b>C32</b> | UV365 LED UV Torch                                                                 | NSUV365                      | Nightsearcher              | 162.5          |
| <b>C33</b> | HD Webcam                                                                          | C922                         | Logitech                   | 65.1           |
| <b>C34</b> | Drop-in Tee Nuts, M5 (~200 units)                                                  | V SLOT-H-DT-M5               | OOznest                    | 40             |

|            | <b>Components</b>                            | <b>Part number</b> | <b>Manufacturer</b>    | <b>Cost (£)</b>      |
|------------|----------------------------------------------|--------------------|------------------------|----------------------|
| <b>C35</b> | MakerLink 90 Degree Hidden Tee Nut x 4 units | V SLOT-H-ML-90H-GS | Openbuilds             | 4.88                 |
| <b>C36</b> | Universal L Brackets x 4 units               | V SLOT-B-UL-S-C    | OOznest                | 4                    |
| <b>C37</b> | Jumper cables                                | MIKROE-511         | MikroElektronika       | 2.41                 |
|            |                                              |                    | <b><i>Subtotal</i></b> | <b><i>278.89</i></b> |
|            |                                              |                    | <b><i>TOTAL</i></b>    | <b><i>~1870</i></b>  |

51

52

53 **III. Assembly instruction**

54 Prior to the assembly, the custom-designed parts were 3D printed with PLA or ABS using an  
55 Ultimaker S3 3D printer. A syringe holder and a stage holder were custom-made with  
56 aluminum. All the custom-designed CAD files are listed in **Supplementary Table 4** and are  
57 available on Github.

58  
59

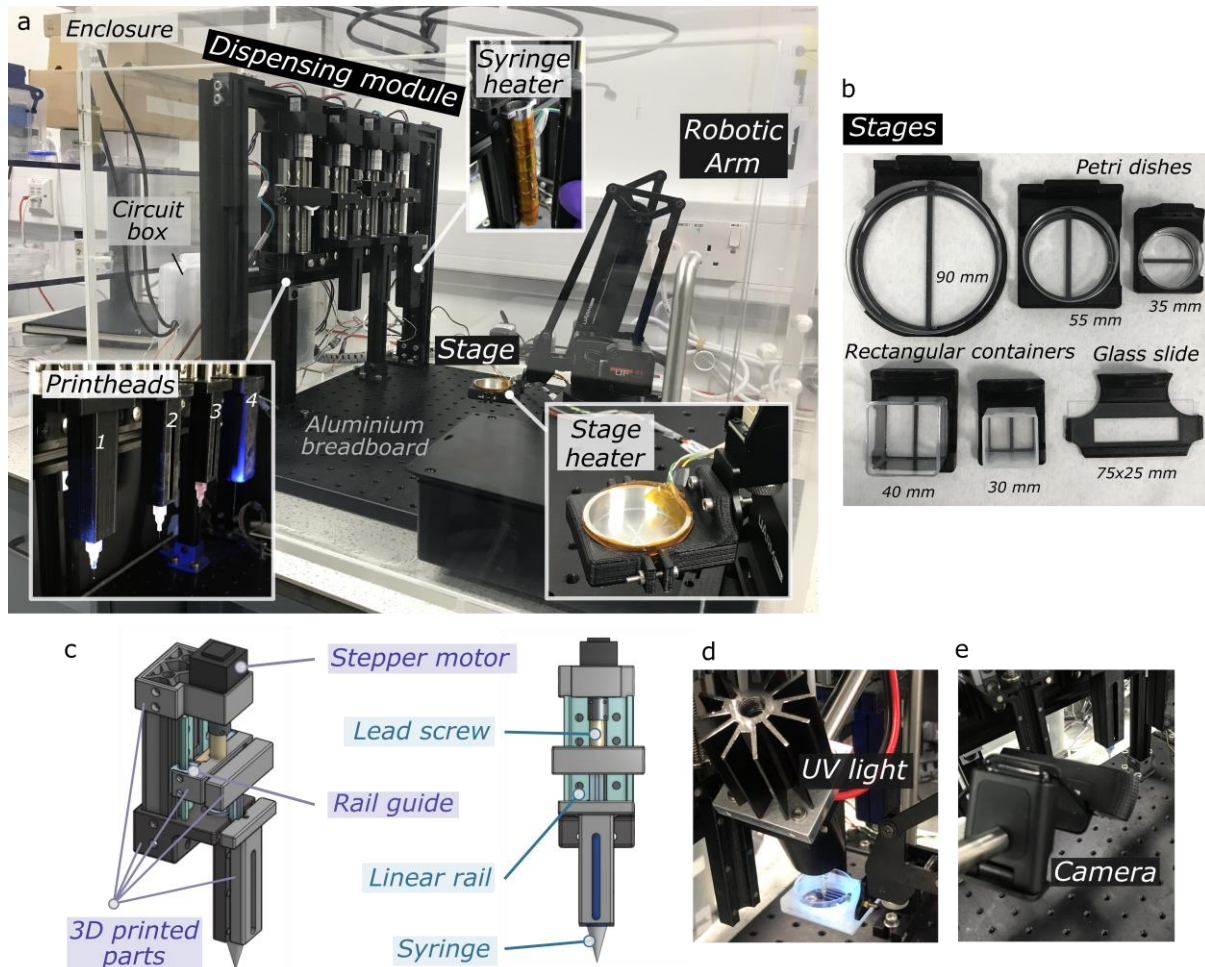

**Supplementary Figure 2** | a) Overview of the setup. b) 3D printed stages for accommodating different sizes of receiving reservoirs. c) 3D CAD design of the piston-driven extrusion printhead. Add-on d) UV light for photopolymerization and e) camera for *in situ* monitoring.



66 **Supplementary Table 4** | Customised accessory list. The printing time is referred to the  
 67 time required when a ‘fast’ print setting is used in Ultimaker.

|                         | <b>Components</b> |                                   | <b>Materials</b>                                                                    | <b>Printing time</b> |             |
|-------------------------|-------------------|-----------------------------------|-------------------------------------------------------------------------------------|----------------------|-------------|
| <b>Frame</b>            | <b>D1</b>         | Rod holder 1 x 2 units            |    | PLA                  | 1 hr        |
|                         | <b>D2</b>         | Rod holder 2                      |    | PLA                  | 1 hr 30 min |
|                         | <b>D3</b>         | Rod holder 3                      |    | PLA                  | 1 hr 30 min |
|                         | <b>D4</b>         | Adapter plate 1                   |    | PLA                  | 30 min      |
|                         | <b>D5</b>         | Adapter plate 2                   |    | PLA                  | 30 min      |
|                         | <b>D6</b>         | Adapter plate 3                   |    | PLA                  | 30 min      |
|                         | <b>D7</b>         | Adapter plate 4                   |    | PLA                  | 30 min      |
|                         | <b>D8</b>         | Adapter plate 5                   |    | PLA                  | 30 min      |
| <b>Printhead</b>        | <b>D9</b>         | Stepper motor holder              |    | PLA                  | 1 hr        |
|                         | <b>D10</b>        | Lead screw adapter_front          |    | PLA                  | 30 min      |
|                         | <b>D11</b>        | Lead screw adapter_back           |    | PLA                  | 50 min      |
|                         | <b>D12</b>        | Syringe holder_back               |    | PLA                  | 2 hr        |
|                         | <b>D13</b>        | Syringe holder_front              |   | PLA                  | 50 min      |
| <b>Printhead heater</b> | <b>D14</b>        | Stepper motor holder              |  | PLA                  | 1 hr        |
|                         | <b>D15</b>        | Lead screw adapter_front          |  | PLA                  | 30 min      |
|                         | <b>D16</b>        | Lead screw adapter_back           |  | PLA                  | 50 min      |
|                         | <b>D17</b>        | Heating syringe holder_back       |  | ABS                  | 2 hr 20 min |
|                         | <b>D18</b>        | Heating syringe holder_front      |  | ABS                  | 1 hr 10 min |
|                         | <b>D19</b>        | Syringe heater barrel_AL          |  | Aluminum             | n/a         |
| <b>Stage</b>            | <b>D20</b>        | 35 mm petri dish stage            |  | PLA                  | 40 min      |
|                         | <b>D21</b>        | 55 mm petri dish stage            |  | PLA                  | 1 hr 20 min |
|                         | <b>D22</b>        | 90 mm petri dish stage            |  | PLA                  | 1 hr 20 min |
|                         | <b>D23</b>        | 30 mm rectangular container stage |  | PLA                  | 40 min      |
|                         | <b>D24</b>        | 38 mm rectangular container stage |  | PLA                  | 1 hr        |
|                         | <b>D25</b>        | 75x25 mm glass slide holder       |  | PLA                  | 50 min      |
| <b>Stage heater</b>     | <b>D26</b>        | 35 mm petri dish heating stage 1  |  | ABS                  | 30 min      |
|                         | <b>D27</b>        | 35 mm petri dish heating stage 2  |  | ABS                  | 30 min      |
|                         | <b>D28</b>        | 35 mm petri dish holder_AL        |  | Aluminium            | n/a         |

## 68 **II.1 Printhead assembly**

69 **Supplementary Figure 3** shows the step-by-step assembly instruction of a printhead. **1.** Before  
70 assembling the printhead, the lead screw (*Part C8*) was milled to the designed dimension. (see  
71 **Supplementary Figure 3**, step 1). **2.** Next, the stepper motor (*Part C6*) was attached to the 3D  
72 printed motor holder using M2.5 screws. **3.** The stepper motor holder was then inserted to an  
73 aluminium rail (*Part C2*) and locked in place with the drop in tee nuts (*Part C34*) and M5  
74 screws. **4.** A shaft coupling (*Part C7*) was connected to the motor shaft and tightened using the  
75 built-in set screw. **5.** Two 10 cm linear rails (*Part C10*) were tightened firmly on the aluminium  
76 rail using M5 screws at a position of ~28 mm from the top edge of the aluminium rail. **6.** A  
77 linear guide pillow block (*Part C11*) was inserted to each linear rail. **7.** The modified lead  
78 screw was combined with a lead screw nut (*Part C9*), which was then tightened on a 3D printed  
79 lead screw nut mount. **8.** The lead screw was tightened to the shaft coupling, and the 3D printed  
80 lead screw nut mount was then linked to the linear guide pillow blocks on the linear rail using  
81 M4 screws. **9.** The end of the lead screw was connected to a ball bearing (*Part C12*) that was  
82 fit to a 3D printed syringe holder. **10.** The 3D printed syringe holder was then tightened on the  
83 aluminium rail using M5 screws and the drop in Tee nuts. **11.** The printhead assembly was  
84 finished by placing magnets (*Parts C14 & C15*) to the designed holes of the lead screw nut  
85 mounts and the syringe holders using super glue.

86

87 The heating printhead was assembled similarly using different 3D printed parts of syringe  
88 holders (*Parts D17 & D18*) that were custom-made to fit an aluminium barrel (*Part D19*). The  
89 aluminium barrel was wrapped with a Nichrome wire as the heating wire (*Part C30*) and a K-  
90 type thermocouple (*Part C24*) as the temperature sensor using a high temperature tape (*Part*  
91 *C31*).

92

93

## 94 **II.2 Installation of printheads to the frame**

95 The frame of the dispensing module is made of six aluminium rails, and was assembled using  
96 hidden tee nuts and L brackets (*Parts C35 & C36*) as linkages according to **Supplementary**  
97 **Figure 3**. The frame was then fastened on the aluminium breadboard by means of the  
98 customised 3D printed adapters. In total, 4 printheads were built. They were firmly installed to  
99 the frame using the 3D printed adapter plates.

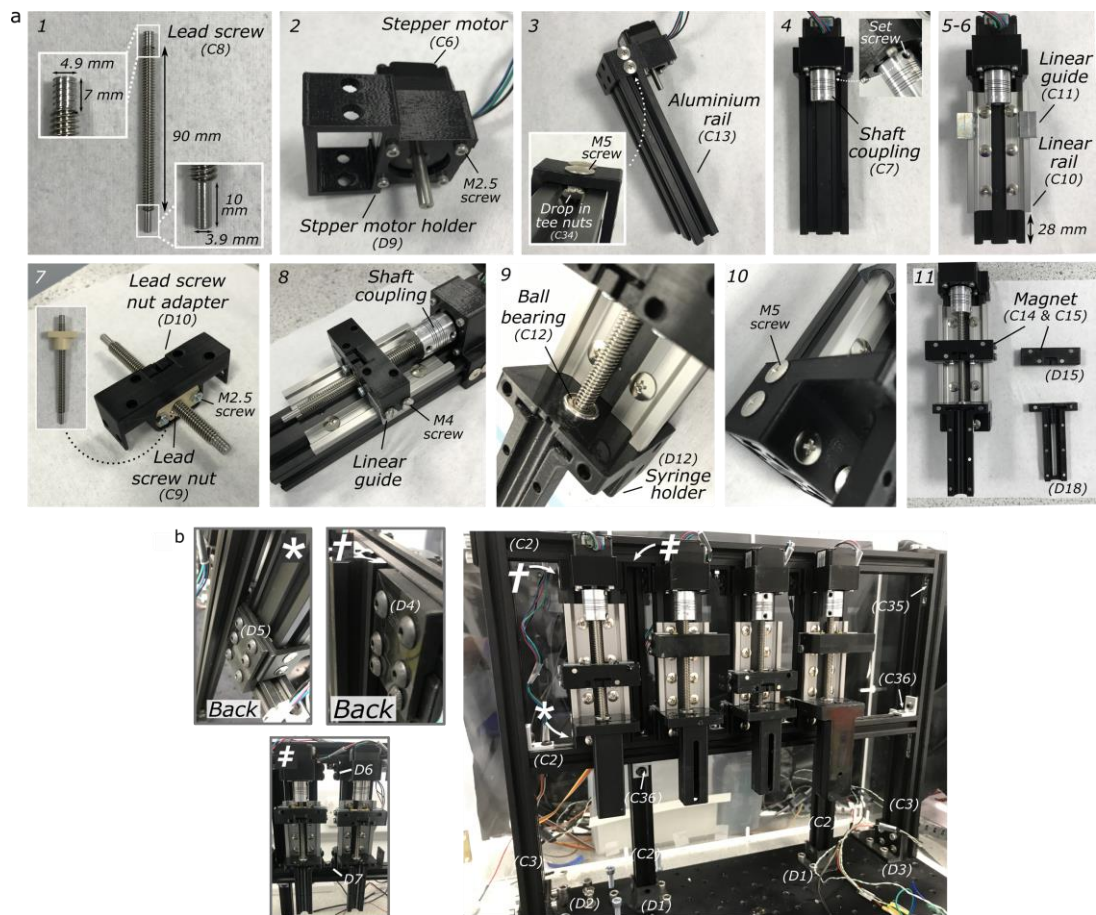

100

101 **Supplementary Figure 3** | Printhead assembly.

102

103 **II.3 Installation of 3D printed stage to the robotic arm**

104 All 3D printed stages were designed to mount to the uArm with an adapter piece obtained from  
 105 the laser engraving kit of the uArm. To connect the stage to the uArm, first, the adapter piece  
 106 was disassembled from the laser engraving kit (see **Supplementary Figure 4a**, Step 1). The  
 107 adapter piece was then attached to the 3D printed stage using M3 screws (Step 2), inserted and  
 108 fastened to the uArm using the hand screw of the uArm (Step 3). The uArm was locked firmly  
 109 on an aluminium breadboard (*Part C4*) using clamps (*Part C5*) (Step 4).

110

111 For the heating stage, an aluminium holder (*Part D28*) was made for fitting a 3.5 mm petri dish.  
 112 The aluminium holder was then wrapped with a heating coil (*Part C30*) with a K-type  
 113 thermocouple (*Part C24*) placed on the holder using a high temperature tape (*Part C31*). The  
 114 holder was then clamped by two 3D printed parts (*Parts D26 & D27*) to form the heating stage  
 115 (**Supplementary Figure 4b**). The installation of the heating stage to the uArm was the same  
 116 as the procedure mentioned above.

117

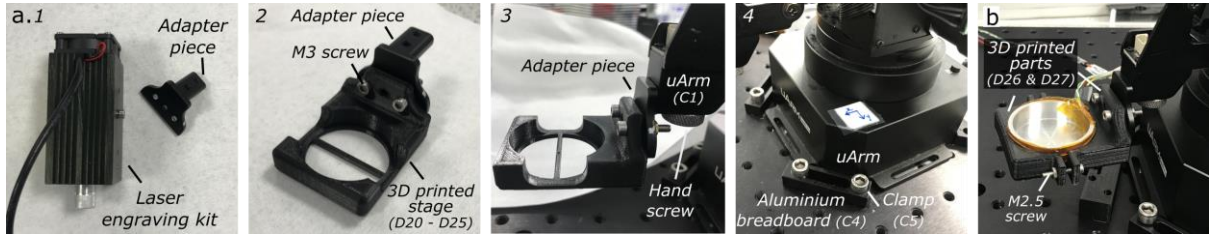

118

119 **Supplementary Figure 4 | a)** Assembly procedure of the stage to the uArm. **b)** A detailed  
120 view of the heating stage.

121

## 122 II.4 Electrical circuit of the printheads

123 **Supplementary Figure 5** shows the circuit diagram of a printhead. The stepper motor of the  
124 printhead is controlled by an Arduino board. Before connecting the stepper motor to the  
125 Arduino board, a current limiting procedure was carried out with the motor drive to limit the  
126 loaded current. This procedure was to prevent the loaded current from exceeding the rated  
127 current of the stepper motor, hence avoiding overheating of the stepper motor. The procedure  
128 was carried as follows<sup>39</sup>. First, the current limit of the motor drive,  $I_{max}$ , and the reference  
129 voltage of the motor drive,  $V_{ref}$ , were calculated using the below equations. The actual current  
130 limit of the stepper motor,  $I_{rating}$ , is usually 70% of the driver current limit,  $I_{max}$ .  $I_{rating}$  is 670  
131 mA according to the stepper motor specification<sup>40</sup> and  $R_{cs}$  is the current sense resistance of the  
132 motor drive, which is  $0.068 \Omega$ <sup>39</sup>.

$$I_{max} = \frac{I_{rating}}{0.7} = \frac{0.67}{0.7} = 0.96 \text{ A} \quad (1)$$

$$V_{ref} = 8 \times I_{max} \times R_{cs} = 8 \times 0.96 \times 0.068 = 390 \text{ mV} \quad (2)$$

133

134 Next, an Arduino script was written for running the motor drive in full step mode by setting  
135 the logic levels of the MS1, MS2 and MS3 pins to 'LOW'. After ensuring the motor was not  
136 connected to the motor drive, the script was uploaded to the Arduino board. A multimeter was  
137 then used to measure the voltage,  $V_{ref}$ , between the potentiometer and the GND pin connecting  
138 to the Arduino board (see **Supplementary Figure 5**).  $V_{ref}$  was tuned to approximately 390 mV  
139 by rotating the potentiometer using a screwdriver.

140

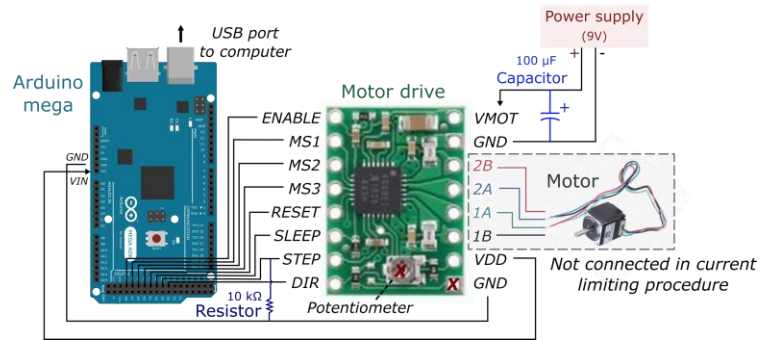

141

142 **Supplementary Figure 5| Circuit diagram for connecting a stepper motor with**  
 143 **Arduino and a motor drive.** In the current limiting procedure, the stepper motor was  
 144 detached from the circuit.  $V_{ref}$  was measured between the potentiometer and the GND  
 145 pin to the Arduino board, as indicated by the red crosses.

146

147 After the current limiting procedure, the stepper motor was connected to the motor drive  
 148 the arrangement shown in **Supplementary Figure 5**. Overall, a single Arduino mega board  
 149 and a power supply were used to control and operate four printheads. **Supplementary Figure**  
 150 **6** shows the overall circuit diagram. As an Arduino mega board has 54 digital pins and the  
 151 control of each printhead requires 8 digital pins, more printheads can be incorporated into the  
 152 system if needed.

153

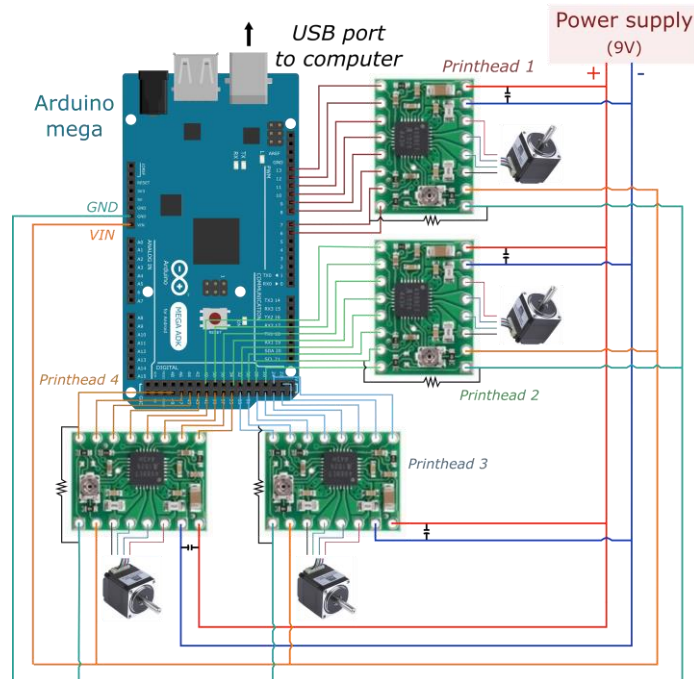

154

155 **Supplementary Figure 6| Overall circuit diagram of the dispensing module**  
 156 **composed of four printheads.**

157 **II.5 Electrical circuit of the heaters**

158 **Supplementary Figure 7** shows the circuit diagram of the heating module. The syringe heater  
159 was connected to a power adapter with rating of 9 V and 2 A, whereas the stage heater was  
160 powered by a power adapter with a 12 V and 500 mA rating. An Arduino nano board and a  
161 MOSFET were employed to control each heating module because of their compactness in size.  
162

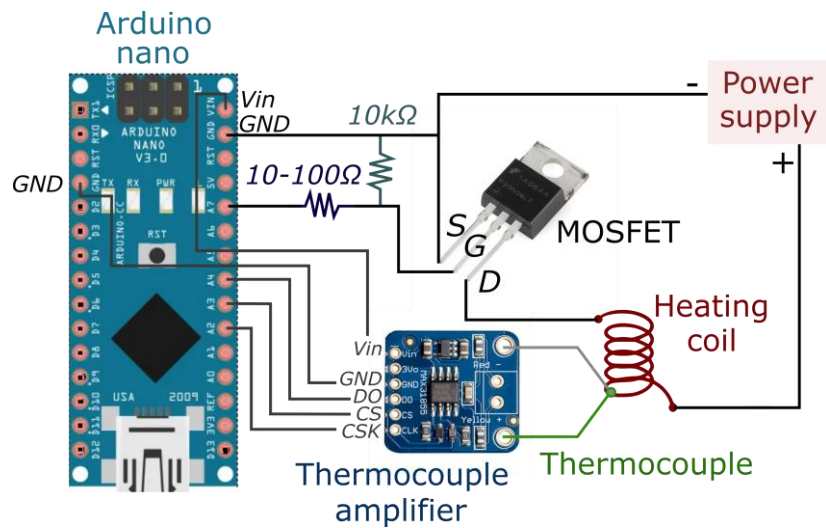

163  
164  
165  
166  
167  
168  
169  
170  
171  
172  
173  
174  
175  
176  
177  
178  
179

**Supplementary Figure 7 | Circuit diagram of a heating module.**

**II.6 UV module and camera**

A UV light source can be easily mounted onto the aluminium breadboard when needed. Here,  
a low power UV light torch (5 W, NSUV365, Nightsearcher) with wavelength of 365 nm. A  
camera unit (C922, Logitech) was added onto the breadboard for *in-situ* monitoring and  
recording the printing process.

180 **IV. Maximum build volume**

181 The maximum build volume is estimated by subtracting the weight of the customised stage  
 182 from the payload capacity of the robotic arm (see **Supplementary Table 5** which provides the  
 183 estimated maximum build volume when different built stages are in use). The estimated  
 184 maximum build volume is ~ 490 cm<sup>3</sup> (assuming the density of the material is equal to 1g/cm<sup>3</sup>,  
 185 i.e. the approximate density of most soft materials).

186

187 **Supplementary Table 5**| Estimated maximum build volume when different built stages  
 188 are in use.

| Stages                            | Weight of the customised stages (g) | Estimated max. build volume (cm <sup>3</sup> ) |
|-----------------------------------|-------------------------------------|------------------------------------------------|
| 35 mm petri dish stage            | 8                                   | 492                                            |
| 55 mm petri dish stage            | 15                                  | 485                                            |
| 90 mm petri dish stage            | 15                                  | 485                                            |
| 30 mm rectangular container stage | 7                                   | 493                                            |
| 38 mm rectangular container stage | 11                                  | 489                                            |
| 75x25 mm glass slide holder       | 10                                  | 490                                            |
| 35 mm petri dish heating stage    | 20.9                                | 479                                            |

189

190

191 **V. Theoretical resolution of the printhead**

192 The theoretical volumetric resolution per step of the printhead when using a sixteenth micro-  
 193 stepping resolution was calculated using below equations<sup>23</sup>. A microstepping stepper motor  
 194 drive (*A4988, Pololu*) was chosen as it enables five microstep resolutions (full, 1/2, 1/4, 1/8  
 195 and 1/16 step)<sup>39</sup>. The selected stepper motor and the threaded rod have a step angle of 1.8°  
 196 and a pitch spacing of 2.54 mm<sup>40,41</sup>.

197

198 **Step per revolution** = 360/step angle = 360/1.8 = 200 steps per revolution

199 **Steps per mm** =  $\frac{1}{\text{pitch spacing}} \times \frac{1}{\text{micro-stepping resolution}} \times \text{steps per revolution}$

200 =  $\frac{1 \text{ revolution}}{2.54 \text{ mm}} \times \frac{1}{\frac{1}{16}} \times \frac{200 \text{ steps}}{1 \text{ Revolution}} = 1260 \text{ steps/mm}$

201 **Dispensing resolution** = 1 mm/1260 steps = 0.8 μm per step

202

203 **VI. Printing demonstration**

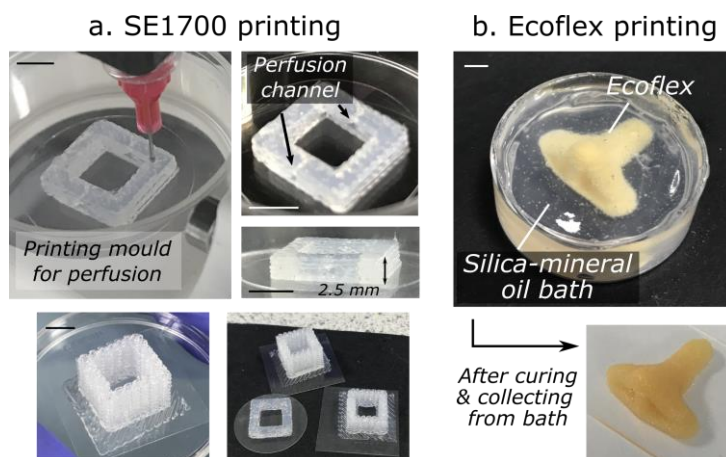

204

205 **Supplementary Figure 8** | Fabrication of a) perfusion moulds made of SE1700 and b) a  
206 3D nose model made of Ecoflex using Printer.HM. Both constructs were printed using  
207 CAD files as the geometry inputs. The SE1700 ink was printed with a 25G needle, using  
208 a stage speed of 2 mm/s and an extrusion flowrate of 825  $\mu\text{L}/\text{h}$ . The SE1700 construct  
209 was then cured at 70°C overnight. For the ecoflex printing, the ecoflex ink was prepared  
210 following a similar formulation reported in a previous study, where Part A ecoflex 00-  
211 30 was mixed with Part B Ecoflex 00-30 (with 1.2w/v% Slo-jo and 1.2 w/v% Thivex) at  
212 1:1 wt. ratio with the addition of a drop of oil-based light orange color ink for  
213 visualisation. The ink was then embedded printed in a 6 w/v% fumed silica – mineral oil  
214 support bath. The printing was performed with a 27G needle, extrusion speed of 825  
215  $\mu\text{L}/\text{h}$  and a stage speed of 2 mm/s. The printing time was around 30 min. After printing,  
216 the printed construct was left at room temperature for 2 days for curing before collecting  
217 it from the bath. Scale bars = 5 mm.

218

219



220 **VII. Theoretical linewidth calculation**

221 The cross-sectional area,  $A$ , of the printed filament, when it is printed at over-extrusion  
222 condition (see **Supplementary Figure 9**), can be calculated using the following equation:

223 
$$A = \frac{Q}{v_{dragging}}$$

224 where  $Q$  = Extrusion flowrate and  $v_{dragging}$  = dragging speed of the filament, which can be  
225 assumed as the speed of the stage,  $v_{stage}$ . Therefore,

226 
$$A = \frac{\pi d^2}{4} = \frac{Q}{v_{stage}}$$

227 And, the theoretical line width,  $d$ , can be calculated as

228 
$$d = \sqrt{\frac{4Q}{\pi \cdot v_{stage}}}$$

229

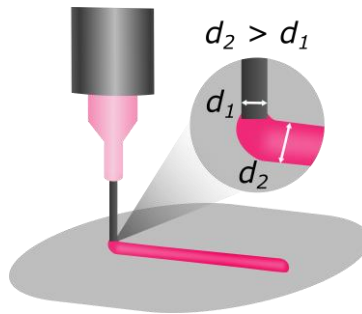

230

231 **Supplementary Figure 9** | Schematic showing the over-extrusion condition, where the  
232 diameter of the filament,  $d_2$  is greater than the nozzle diameter,  $d_1$  (die swell ratio  $> 1$ ).

233

## 234 VIII. Codes for the printing operation

235 Below shows the user-defined inputs in the Python programme templates for different  
236 geometry inputs. The codes are available on Github. Users only need to define the inputs in the  
237 programme and the operation process will be executed automatically.

238

```
# User-defined inputs
x_line = [-10, -10, -10] # Enter x-coordinate in mm
y_line = [-10, 0, 10] # Enter y-coordinate in mm
spp = 30 # Printing speed
Z0 = 67.5 # Starting z position
delaytime = 30000 # Delaytime in  $\mu$ s between steps of the stepper motor
printhead = 3 # Assigned number of the printhead in use, 1 - 4 (4 printheads)
stage = 1 # Assigned number of the stage
# Petri dish '1': 35 mm, '2': 55 mm, '3': 90 mm, '4': 35 mm heating stage
# Rectangular container '5': 33 mm, '6': 40 mm
# '7': Standard glass slide
offset = [0, 0, Z0] # Setting as [0,0,Z0] means printing at the central point (a_gcode,b_gcode) of the stage at Z0
```

239

240 **Supplementary Figure 10**| The required inputs in the Python template for using  
241 coordinates as the geometry input

```
# User-defined inputs
# Input equations (i.e. equation of circle)
R = 4.5
Theta = np.linspace(0, 2 * np.pi, 20)[-1]
x_cir = R * np.cos(Theta)
y_cir = R * np.sin(Theta)
# Printing parameters
s = 0.3 # Layer height
Z0 = 66.8 # Starting z position
spp = 70 # printing speed
L1 = 1 # Thickness of the construct, mm
delaytime = 30000 # Delaytime in  $\mu$ s between steps of the stepper motor
printhead = 3 # Assigned number of the printhead in use, 1 - 4 (4 printheads)
stage = 1 # Assigned number of the stage
# Petri dish '1': 35 mm, '2': 55 mm, '3': 90 mm, '4': 35 mm heating stage
# Rectangular container '5': 33 mm, '6': 40 mm
# '7': Standard glass slide
offset = [0, 0, Z0] # Setting as [0,0,Z0] means printing at the central point (a_gcode,b_gcode) of the stage at Z0
```

242

243 **Supplementary Figure 11**| The required inputs in the Python template for using  
244 equations as the geometry input.

245

```
# User-defined inputs
spp = 30 # Printing speed
snp = 2000 # Speed at non-printing paths
Z0 = 67.5 # Starting z position
delaytime = 31000 # Delaytime in  $\mu$ s between steps of the stepper motor
printhead = 3 # Assigned number of the printhead in use, 1 - 4 (4 printheads)
stage = 1 # Petri dish '1': 35 mm, '2': 55 mm, '3': 90 mm, '4': 35 mm heating stage
# Rectangular container '5': 33 mm, '6': 40 mm
# '7': Standard glass slide
offset = [0, 0, Z0] # Setting as [0,0,Z0] means printing at the central point (a_gcode,b_gcode) of the stage at Z0
gcode_file = r"C:\Users\Biointerface\Documents\UArmPython\examples\Iek\Letter_P_15_15_1mm-80R-0_5s.txt" # import gcode file
```

246

247 **Supplementary Figure 12**| The required inputs in the Python template for using G-code  
248 generated from CAD as the geometry input. The conversion of CAD to G-code was made  
249 using 3D Slic3R, an open-source 3D slicing software.

250

```
# User-defined parameters
spp = 10 # Printing speed
snp = 2000 # Speed at non-printing paths
Z0 = 67.5 # Starting z position
delaytime = 31000 # Delaytime in  $\mu$ s between steps of the stepper motor
printhead = 3 # Assigned number of the printhead in use, 1 - 4 (4 printheads)
stage = 1 # Petri dish '1': 35 mm, '2': 55 mm, '3': 90 mm, '4': 35 mm heating stage
        # Rectangular container '5': 33 mm, '6': 40 mm
        # '7': Standard glass slide
offset = [0, 0, Z0] # Setting as [0,0,Z0] means printing at the central point (a_gcode,b_gcode) of the stage at Z0
# Import G-code file of picture generated from Inkscape
inkscape_file = r"C:\Users\Biointerface\Documents\uArmPython\examples\Iek\Butterfly2_0001.txt"
```

251

252 **Supplementary Figure 13** | The required inputs in the Python template for using picture-  
253 generated G-code as the geometry input. The conversion of picture to G-code was made  
254 using Inkscape, an open-source graphics software.

255

## 256 **IX. Conversion of pictures to G-code**

257 Printing with picture input was enabled by the ‘Gcodetools’ extension on Inkscape  
258 (<https://inkscape.org/>), which was an extension designed for CNC machines. The extension  
259 was installed on Inkscape. To convert a picture into printing paths, the workplace size on  
260 Inkscape was first adjusted according to the size of the stage by clicking ‘File → Document  
261 properties → Custom sizes’. The acceptable form of pictures can be photos of hand-drawn  
262 sketches, pictures created by any drawing software or drawings created on Inkscape. For photos  
263 of hand-drawn sketches or pictures created by other drawing software, the pictures were  
264 imported to Inkscape and were converted to a vector path using the following procedures: 1)  
265 Convert the image to a binary image (‘Filters → Color → Greyscale’) and 2) Trace the  
266 centreline of the image (‘Extensions → Images → Centerline Trace 0.8a → Select ‘Replace  
267 image with vector graphics’ and ‘Trace bright lines’). For drawings created on Inkscape, the  
268 drawing was converted to paths by clicking ‘Path → Object to path’. After converting the  
269 picture to path, the path was then placed at the centre of the workplace and was converted to a  
270 G-code file by applying the following step: 1) Navigate to ‘Extensions → Gcodetools →  
271 Orientation points’ and select ‘2-points mode’, 2) click ‘Extensions → Gcodetools → Tool  
272 library’ and select ‘Cone’; and 3) Select the path, navigate to ‘Extensions → Gcodetools →  
273 Path to Gcode’ and save the file by clicking ‘Apply’ under the ‘Path to Gcode’ tab with the file  
274 name defined in the ‘Preferences’ tab. The generated file was then imported to the Python  
275 programme for the picture input (See Supplementary Figure 12), which was designed for  
276 reading the G-code files generated by this extension.

277

278 **X. Ink preparation**

279 **Supplementary Table 6| Formulations of the inks and support baths used in this**  
 280 **work.** Concentration is expressed as w/v% unless specified.

| Inks                                                                                  | Support baths / matrices                                     | Heating / UV            | Figures                       |
|---------------------------------------------------------------------------------------|--------------------------------------------------------------|-------------------------|-------------------------------|
| 30% Pluronic F127                                                                     | -                                                            | Stage heating at 40°C   | 2a (Hand)                     |
| 40% Pluronic F127                                                                     | 1.3% xanthan gum:<br>PEGDA 700: I2959<br>(10:1:1 vol. ratio) | Syringe heating at 50°C | 2a (Vascular network)         |
| 68 wt% methacrylate hydroxypropyl cellulose <sup>42</sup>                             | -                                                            | UV                      | 2a (Letter H)                 |
| PEGDA 700: DIW: I2959 (2:8:1 vol. ratio)                                              | 1% Carbopol                                                  | -                       | 2b                            |
| Collagen                                                                              | 4.5% gelatin slurry                                          | -                       | 2b                            |
| SE1700 (base:catalyst at 10:1 wt. ratio)                                              | -                                                            | -                       | 2b,<br>Supplementary Figure 8 |
| 10% Sodium carboxymethyl cellulose                                                    | -                                                            | -                       | 2b                            |
| 40% Pluronic F127                                                                     | -                                                            | -                       | 2c, 2d                        |
| SE 1700                                                                               | -                                                            | -                       | 3a (Rectangular container)    |
| 40% Pluronic F127                                                                     | -                                                            | -                       | 3a (Triangle)                 |
| 40% Pluronic F127                                                                     | 10% gelatin + 1.3% xanthan gum                               | Stage heating at 40°C   | 3a (Channel)                  |
| SE 1700                                                                               | -                                                            | -                       | 3b (Sine wave)                |
| 30% Pluronic F127                                                                     | -                                                            | Stage heating at 40°C   | 3b (Tube)                     |
| 40% Pluronic F127                                                                     | -                                                            | -                       | 3b (Butterfly curve)          |
| 40% Pluronic F127                                                                     | 2% agarose                                                   | -                       | 3b (Circle)                   |
| 30% Pluronic F127                                                                     | -                                                            | Stage heating at 40°C   | 3c (Hand)                     |
| 15% hydroxyapatite + 5% alginate, pre-crosslinked with 200 mM CaCl <sub>2</sub>       | -                                                            | -                       | 3c (Femur)                    |
| 10% Sodium carboxymethyl cellulose                                                    | -                                                            | -                       | 3c (leaf)                     |
| 10% alginate, pre-crosslinked with 200 mM CaCl <sub>2</sub>                           | 1.3% xanthan gum                                             | -                       | 3c (grid and Y-shaped tube)   |
| 40% Pluronic F127                                                                     | 1.3% xanthan gum:<br>PEGDA 700: I2959<br>(10:1:1 vol. ratio) | Syringe heating at 50°C | 3d.i                          |
| 40% Pluronic F127                                                                     | -                                                            | -                       | 3d.ii                         |
| 25% polyacrylic acid                                                                  | Fumed silica-mineral oil bath                                | -                       | 3d.iii                        |
| 3T3 cell suspension                                                                   | -                                                            | -                       | 4a                            |
| 40% Pluronic F127                                                                     | 1% Carbopol                                                  | -                       | 4b                            |
| 40% Pluronic F127                                                                     | -                                                            | -                       | 4c                            |
| 40% Pluronic F127                                                                     | -                                                            | -                       | 6b                            |
| 3% Sodium hyaluronate                                                                 | 1% Carbopol                                                  | -                       | 6c.i                          |
| 10% alginate, pre-crosslinked with 200 mM CaCl <sub>2</sub>                           | 1.3% Xanthan gum                                             | -                       | 6c.ii – 6c.iii                |
| Part A:Part B Ecoflex 00-30 (with 1.2w/v% Slo-jo and 1.2 w/v% Thivex) (1:1 wt. ratio) | -                                                            | -                       | Supplementary Figure 8        |

281

282

## 283 **XI. Supplementary videos**

284 **Supplementary Video 1:** Video showing the fabrication of a rectangular container using  
285 coordinates as the geometry input.

286

287 **Supplementary Video 2:** Video showing the printing of a butterfly pattern using equations  
288 as the geometry input.

289

290 **Supplementary Video 3:** Video showing the printing of a vascular-like structure using a  
291 CAD file as geometry input.

292

293 **Supplementary Video 4:** The morphing of a flower-like construct made of poly(acrylic acid)  
294 in 1M Tris solution. The flower-like construct was designed with heterogeneous printing and  
295 was printed using the geometry input of picture.

296

297 **Supplementary Video 5:** Dispensing of cell suspension using Printer.HM

298

299 **Supplementary Video 6:** Video demonstrating the non-planar printing capability of  
300 Printer.HM. A pluronic line pattern was printed on the non-planar surface of a nose model.

301

302 **Supplementary Video 7:** Video demonstrating the pick-and-place operation.

303

## 304 **Supplementary References**

- 305 1. Hinton TJ, Jallerat Q, Palchesko RN, et al. Three-dimensional printing of complex  
306 biological structures by freeform reversible embedding of suspended hydrogels.  
307 *Science Advances*. 2015;1(9):e1500758-e1500758. doi:10.1126/sciadv.1500758
- 308 2. Reid JA, Mollica PA, Johnson GD, Ogle RC, Bruno RD, Sachs PC. Accessible  
309 bioprinting: Adaptation of a low-cost 3D-printer for precise cell placement and stem  
310 cell differentiation. *Biofabrication*. Published online 2016. doi:10.1088/1758-  
311 5090/8/2/025017
- 312 3. Dela Nava AS, Liberos A, Nieva EG, et al. Dual extruder 3D-bioprinter for computer  
313 designed cardiac structures. In: *Computing in Cardiology*. ; 2017.  
314 doi:10.22489/CinC.2017.146-273

- 315 4. Polley C, Mau R, Lieberwirth C, Stenzel J, Vollmar B, Seitz H. Bioprinting of three  
316 dimensional tumor models: A preliminary study using a low cost 3D printer. *Current*  
317 *Directions in Biomedical Engineering*. Published online 2017. doi:10.1515/cdbme-  
318 2017-0028
- 319 5. Bessler N, Ogiermann D, Buchholz MB, et al. Nydus One Syringe Extruder (NOSE):  
320 A Prusa i3 3D printer conversion for bioprinting applications utilizing the FRESH-  
321 method. *HardwareX*. Published online 2019. doi:10.1016/j.ohx.2019.e00069
- 322 6. Kahl M, Gertig M, Hoyer P, Friedrich O, Gilbert DF. Ultra-low-cost 3D bioprinting:  
323 Modification and application of an off-the-shelf desktop 3D-printer for biofabrication.  
324 *Frontiers in Bioengineering and Biotechnology*. Published online 2019.  
325 doi:10.3389/fbioe.2019.00184
- 326 7. Ioannidis K, Danalatos RI, Champeris Tsaniras S, et al. A Custom Ultra-Low-Cost 3D  
327 Bioprinter Supports Cell Growth and Differentiation. *Frontiers in Bioengineering and*  
328 *Biotechnology*. Published online 2020. doi:10.3389/fbioe.2020.580889
- 329 8. Krige A, Haluška J, Rova U, Christakopoulos P. Design and implementation of a low  
330 cost bio-printer modification, allowing for switching between plastic and gel extrusion.  
331 *HardwareX*. Published online 2021. doi:10.1016/j.ohx.2021.e00186
- 332 9. Tashman JW, Shiwarski DJ, Feinberg AW. A high performance open-source syringe  
333 extruder optimized for extrusion and retraction during FRESH 3D bioprinting.  
334 *HardwareX*. Published online 2021. doi:10.1016/j.ohx.2020.e00170
- 335 10. Engberg A, Stelzl C, Eriksson O, O’Callaghan P, Kreuger J. An open source extrusion  
336 bioprinter based on the E3D motion system and tool changer to enable FRESH and  
337 multimaterial bioprinting. *Scientific Reports*. Published online 2021.  
338 doi:10.1038/s41598-021-00931-1
- 339 11. Koch F, Thaden O, Tröndle K, Zengerle R, Zimmermann S, Koltay P. Open-source  
340 hybrid 3D-bioprinter for simultaneous printing of thermoplastics and hydrogels.  
341 *HardwareX*. Published online 2021. doi:10.1016/j.ohx.2021.e00230
- 342 12. Cadiou T, Demoly F, Gomes S. A hybrid additive manufacturing platform based on  
343 fused filament fabrication and direct ink writing techniques for multi-material 3D  
344 printing. *International Journal of Advanced Manufacturing Technology*. Published  
345 online 2021. doi:10.1007/s00170-021-06891-0
- 346 13. Leech DJ, Lightfoot S, Huson D, Stratakos A. Low-Cost, Modular Modification to a  
347 Desktop 3D Printer for General Purpose Gel/Paste Extrusion & Direct Ink

- 348 Writing. *bioRxiv*. Published online March 11, 2021:2021.03.10.434735.  
349 doi:10.1101/2021.03.10.434735
- 350 14. Sanz-Garcia A, Sodupe-Ortega E, Pernía-Espinoza A, Shimizu T, Escobedo-Lucea C.  
351 A versatile open-source printhead for low-cost 3d microextrusion-based bioprinting.  
352 *Polymers (Basel)*. Published online 2020. doi:10.3390/polym12102346
- 353 15. Mirdamadi E, Tashman JW, Shiwarski DJ, Palchesko RN, Feinberg AW. FRESH 3D  
354 Bioprinting a Full-Size Model of the Human Heart. *ACS Biomaterials Science and*  
355 *Engineering*. Published online 2020. doi:10.1021/acsbiomaterials.0c01133
- 356 16. Pusch K, Hinton TJ, Feinberg AW. Large volume syringe pump extruder for desktop  
357 3D printers. *HardwareX*. Published online 2018. doi:10.1016/j.ohx.2018.02.001
- 358 17. Lee A, Hudson AR, Shiwarski DJ, et al. 3D bioprinting of collagen to rebuild  
359 components of the human heart. *Science (1979)*. Published online 2019.  
360 doi:10.1126/science.aav9051
- 361 18. Ravi P, Shiakolas PS, Oberg JC, Faizee S, Batra AK. On the development of a  
362 modular 3d bioprinter for research in biomedical device fabrication. In: *ASME*  
363 *International Mechanical Engineering Congress and Exposition, Proceedings*  
364 *(IMECE)*. ; 2015. doi:10.1115/IMECE2015-51555
- 365 19. Xing J, Luo X, Bermudez J, Moldthan M, Li B. 3D bioprinting of scaffold structure  
366 using micro-extrusion technology. In: *Solid Freeform Fabrication 2017: Proceedings*  
367 *of the 28th Annual International Solid Freeform Fabrication Symposium - An Additive*  
368 *Manufacturing Conference, SFF 2017*. ; 2020.
- 369 20. Fitzsimmons RE, Aquilino MS, Quigley J, Chebotarev O, Tarlan F, Simmons CA.  
370 Generating vascular channels within hydrogel constructs using an economical open-  
371 source 3D bioprinter and thermoreversible gels. *Bioprinting*. Published online 2018.  
372 doi:10.1016/j.bprint.2018.02.001
- 373 21. Yenilmez B, Temirel M, Knowlton S, Lepowsky E, Tasoglu S. Development and  
374 characterization of a low-cost 3D bioprinter. *Bioprinting*. Published online 2019.  
375 doi:10.1016/j.bprint.2019.e00044
- 376 22. Lanaro M, Luu A, Lightbody-Gee A, et al. Systematic design of an advanced open-  
377 source 3D bioprinter for extrusion and electrohydrodynamic-based processes.  
378 *International Journal of Advanced Manufacturing Technology*. Published online 2021.  
379 doi:10.1007/s00170-021-06634-1



- 380 23. Shen EM, McCloskey KE. Affordable, high-resolution bioprinting with embedded  
381 concentration gradients. *Bioprinting*. Published online 2021.  
382 doi:10.1016/j.bprint.2020.e00113
- 383 24. Peng X, Kuang X, Roach DJ, et al. Integrating digital light processing with direct ink  
384 writing for hybrid 3D printing of functional structures and devices. *Additive  
385 Manufacturing*. 2021;40. doi:10.1016/j.addma.2021.101911
- 386 25. Uzel SGM, Weeks RD, Eriksson M, Kokkinis D, Lewis JA. Multimaterial Multinozzle  
387 Adaptive 3D Printing of Soft Materials. *Advanced Materials Technologies*. Published  
388 online 2022. doi:10.1002/admt.202101710
- 389 26. Shim JH, Lee JS, Kim JY, Cho DW. Bioprinting of a mechanically enhanced three-  
390 dimensional dual cell-laden construct for osteochondral tissue engineering using a  
391 multi-head tissue/organ building system. *Journal of Micromechanics and  
392 Microengineering*. Published online 2012. doi:10.1088/0960-1317/22/8/085014
- 393 27. Lee J, Kim KE, Bang S, Noh I, Lee C. A desktop multi-material 3D bio-printing  
394 system with open-source hardware and software. *International Journal of Precision  
395 Engineering and Manufacturing*. Published online 2017. doi:10.1007/s12541-017-  
396 0072-x
- 397 28. Byrne O, Coulter F, Glynn M, et al. Additive manufacture of composite soft pneumatic  
398 actuators. *Soft Robotics*. 2018;5(6). doi:10.1089/soro.2018.0030
- 399 29. Ozbolat V, Dey M, Ayan B, Ozbolat IT. Extrusion-based printing of sacrificial  
400 Carbopol ink for fabrication of microfluidic devices. *Biofabrication*. Published online  
401 2019. doi:10.1088/1758-5090/ab10ae
- 402 30. Spiesz EM, Yu K, Lehner BAE, Schmieden DT, Aubin-Tam ME, Meyer AS. Three-  
403 dimensional patterning of engineered biofilms with a do-it-yourself bioprinter. *Journal  
404 of Visualized Experiments*. Published online 2019. doi:10.3791/59477
- 405 31. Ghosheh M, Daloo H, Usta YH, Isler Y, Karaman O. Development of innovative  
406 custom design bioprinter. In: *2016 20th National Biomedical Engineering Meeting,  
407 BIYOMUT 2016*. ; 2017. doi:10.1109/BIYOMUT.2016.7849409
- 408 32. Fortunato GM, Rossi G, Bonatti AF, et al. Robotic platform and path planning  
409 algorithm for in situ bioprinting. *Bioprinting*. Published online 2021.  
410 doi:10.1016/j.bprint.2021.e00139
- 411 33. Allevi 3 - Allevi. Accessed December 3, 2021. <https://www.allevi3d.com/allevi-3/>
- 412 34. Printheads - CELLINK. Accessed December 3, 2021.  
413 <https://www.cellink.com/printheads/>

- 414 35. BIO X 3D Bioprinter - CELLINK. Accessed December 3, 2021.  
415 <https://www.cellink.com/bioprinting/bio-x-3d-bioprinter/#1599208824211-437eb779->  
416 [d3ea](https://www.cellink.com/bioprinting/bio-x-3d-bioprinter/#1599208824211-437eb779-d3ea)
- 417 36. 3D-Bioplotter® Starter Series | EnvisionTEC. Accessed December 3, 2021.  
418 <https://envisiontec.com/3d-printers/3d-bioplotter/starter-series/>
- 419 37. Bioprinter - The modular Solution for Tissue Engineering from GeSiM. Accessed  
420 December 3, 2021. <https://gesim-bioinstruments-microfluidics.com/bioprinter/>
- 421 38. Zhang YS, Haghiashiani G, Hübscher T, et al. 3D extrusion bioprinting. *Nature*  
422 *Reviews Methods Primers* 2021 1:1. 2021;1(1):1-20. doi:10.1038/s43586-021-00073-8
- 423 39. Allegro MicroSystems. A4988 - DMOS Microstepping Driver with Translator and  
424 Overcurrent Protection. Accessed August 7, 2021.  
425 <https://www.pololu.com/file/0J450/A4988.pdf>
- 426 40. RS Components Ltd. RS Pro Pro Hybrid, Permanent Magnet Stepper Motor 1.8°. Accessed August 7, 2021. <https://docs.rs-online.com/6f42/0900766b8157a72a.pdf>
- 427  
428 41. drylin® lead screw, dryspin® high helix thread, right-hand thread, 1.4301 (304)  
429 stainless steel. Accessed August 7, 2021. <https://www.igus.com/product/?artNr=DST->  
430 [LS-6.35X2.54-R-ES](https://www.igus.com/product/?artNr=DST-LS-6.35X2.54-R-ES)
- 431 42. Lam C, Chan C, Lei M, et al. 3D Printing of Liquid Crystalline Hydroxypropyl  
432 Cellulose-toward Tunable and Sustainable Volumetric Photonic Structures. Published  
433 online 2022. doi:10.1002/adfm.202108566
- 434
